# Supplementary material for: Persistent C-peptide secretion in Type 1 diabetes and its relationship to the genetic architecture of diabetes
Source: PubMed Central journal article supplement (PMC6706940; doi:10.1186/s12916-019-1392-8), 2019-08-23
Supplement: 12916_2019_1392_MOESM1_ESM.pdf [file 12916_2019_1392_MOESM1_ESM.pdf]

**Table 5** Regressions of age at onset on regional genotypic scores for type 1 diabetes

| Chrom | Start (Mb) | End (Mb) | Num SNPs | Nearest gene         | Coefficient | <i>p</i> value |
|-------|------------|----------|----------|----------------------|-------------|----------------|
| 1     | 39.526     | 39.585   | 2        | <i>BMP8A</i>         | −0.002      | 0.9            |
| 1     | 63.643     | 63.66    | 3        | <i>PGM1</i>          | −0.009      | 0.5            |
| 1     | 113.286    | 113.994  | 28       | <i>PTPN22</i>        | −0.008      | 0.5            |
| 1     | 172.706    | 172.71   | 1        | .                    | −0.003      | 0.8            |
| 1     | 206.767    | 206.784  | 2        | <i>IL10</i>          | −0.003      | 0.8            |
| 2     | 19.704     | 19.704   | 1        | .                    | −0.013      | 0.3            |
| 2     | 100.13     | 100.254  | 10       | <i>AFF3</i>          | −0.014      | 0.3            |
| 2     | 162.254    | 162.404  | 4        | <i>IFIH1</i>         | −0.011      | 0.4            |
| 2     | 203.829    | 203.93   | 13       | <i>CTLA4</i>         | −0.002      | 0.9            |
| 4     | 122.078    | 122.64   | 9        | <i>IL21</i>          | −0.064      | 1e−06          |
| 4     | 165.65     | 165.653  | 1        | .                    | 0.012       | 0.4            |
| 5     | 168.799    | 168.808  | 1        | <i>SLIT3</i>         | 0.019       | 0.1            |
| 6     | 25.082     | 33.885   | 941      | HLA residual         | −0.035      | 0.008          |
| 6     | 25.082     | 33.885   | 941      | HLA serotype         | −0.197      | 1e−50          |
| 6     | 90.104     | 90.293   | 7        | <i>BACH2</i>         | 0.026       | 0.05           |
| 6     | 126.334    | 126.556  | 3        | <i>CENPW</i>         | 0.004       | 0.8            |
| 7     | 50.399     | 50.971   | 6        | <i>IKZF1</i>         | −0.051      | 1e−04          |
| 9     | 4.283      | 4.296    | 8        | <i>GLIS3</i>         | −0.033      | 0.01           |
| 10    | 6.038      | 6.14     | 13       | <i>IL2RA</i>         | −0.017      | 0.2            |
| 10    | 33.13      | 33.137   | 1        | <i>NRP1</i>          | 0           | 1              |
| 11    | 2.08       | 2.291    | 13       | <i>INS</i>           | −0.057      | 2e−05          |
| 11    | 119.966    | 119.966  | 1        | .                    | −0.022      | 0.09           |
| 12    | 55.971     | 56.125   | 12       | <i>ERBB3</i>         | −0.017      | 0.2            |
| 12    | 110.922    | 112.755  | 38       | <i>SH2B3</i>         | −0.017      | 0.2            |
| 14    | 68.797     | 68.797   | 1        | .                    | −0.017      | 0.2            |
| 14    | 98.033     | 98.033   | 1        | .                    | 0.021       | 0.1            |
| 15    | 78.939     | 78.947   | 2        | <i>CTSH</i>          | −0.059      | 9e−06          |
| 16    | 10.946     | 11.342   | 36       | <i>CLEC16A</i>       | 0.003       | 0.8            |
| 16    | 28.29      | 28.62    | 8        | <i>IL27</i>          | −0.01       | 0.4            |
| 16    | 75.213     | 75.262   | 3        | <i>BCAR1</i>         | −0.031      | 0.02           |
| 17    | 39.82      | 40.668   | 13       | <i>ORMDL3</i>        | 0.009       | 0.5            |
| 17    | 45.997     | 45.997   | 1        | <i>MAPT</i>          | −0.004      | 0.8            |
| 18    | 12.747     | 12.877   | 8        | <i>PTPN2</i>         | 0.02        | 0.1            |
| 18    | 69.863     | 69.872   | 2        | <i>CD226</i>         | −0.014      | 0.3            |
| 19    | 46.716     | 46.716   | 1        | <i>PRKD2</i>         | −0.014      | 0.3            |
| 19    | 48.704     | 48.704   | 1        | <i>FUT2</i>          | 0.004       | 0.7            |
| 20    | 1.63       | 1.695    | 4        | <i>RN7SL561P</i>     | 0.001       | 0.9            |
| 20    | 9.424      | 9.424    | 1        | <i>PLCB4</i>         | −0.007      | 0.6            |
| 21    | 42.416     | 42.428   | 5        | <i>UBASH3A</i>       | −0.002      | 0.9            |
| 22    | 29.715     | 30.765   | 17       | <i>ASCC2</i>         | 0.005       | 0.7            |
| 22    | 37.148     | 37.195   | 3        | <i>RAC2</i>          | 0.013       | 0.3            |
| .     | .          | .        | 29       | residual genome-wide | −0.022      | 0.09           |

**Table 6** Regressions of age at onset on regional genotypic scores for type 2 diabetes

| Chrom | Start (Mb) | End (Mb) | Num SNPs | Nearest gene       | Coefficient | <i>p</i> value |
|-------|------------|----------|----------|--------------------|-------------|----------------|
| 1     | 39.147     | 39.57    | 6        | <i>BMP8A</i>       | −0.001      | 0.9            |
| 1     | 213.972    | 213.99   | 15       | <i>PROX1</i>       | 0.025       | 0.06           |
| 1     | 219.479    | 219.615  | 14       | <i>ZC3H11B</i>     | 0.004       | 0.7            |
| 2     | 43.222     | 43.623   | 67       | <i>LINC01126</i>   | −0.009      | 0.5            |
| 2     | 60.307     | 60.372   | 17       | <i>MIR4432HG</i>   | −0.013      | 0.3            |
| 2     | 65.415     | 65.457   | 3        | <i>SPRED2</i>      | −0.002      | 0.9            |
| 2     | 160.234    | 160.4    | 18       | <i>ITGB6</i>       | 0.019       | 0.1            |
| 2     | 226.133    | 226.317  | 17       | .                  | 0.005       | 0.7            |
| 3     | 11.986     | 12.372   | 14       | <i>ACTG1P12</i>    | −0.018      | 0.2            |
| 3     | 22.936     | 23.441   | 4        | <i>RPL24P7</i>     | −0.007      | 0.6            |
| 3     | 64.714     | 64.744   | 7        | <i>ADAMTS9-AS2</i> | −0.007      | 0.6            |
| 3     | 123.217    | 123.391  | 7        | <i>ADCY5</i>       | 0.007       | 0.6            |
| 3     | 185.556    | 185.83   | 20       | <i>IGF2BP2</i>     | 0.003       | 0.8            |
| 4     | 6.263      | 6.323    | 31       | <i>PPP2R2C</i>     | 0.012       | 0.4            |
| 4     | 94.08      | 94.215   | 9        | <i>HMGB3P15</i>    | 0.024       | 0.07           |
| 4     | 184.774    | 184.81   | 12       | <i>ACSL1</i>       | 0           | 1              |
| 5     | 56.558     | 56.566   | 6        | <i>C5orf67</i>     | 0.017       | 0.2            |
| 5     | 102.257    | 102.287  | 3        | <i>SLCO4C1</i>     | −0.005      | 0.7            |
| 6     | 20.529     | 20.989   | 42       | <i>CDKAL1</i>      | −0.001      | 0.9            |
| 6     | 31.139     | 32.629   | 32       | <i>HLA region</i>  | −0.049      | 3e−04          |
| 6     | 126.336    | 126.76   | 14       | <i>CENPW</i>       | 0.002       | 0.9            |
| 7     | 13.846     | 15.026   | 33       | <i>DGKB</i>        | 0.004       | 0.8            |
| 7     | 28.102     | 28.217   | 21       | <i>JAZF1</i>       | 0.031       | 0.02           |
| 7     | 157.184    | 157.239  | 2        | <i>UBE3C</i>       | 0.002       | 0.9            |
| 8     | 41.662     | 41.677   | 3        | <i>ANK1</i>        | −0.006      | 0.7            |
| 8     | 117.171    | 117.225  | 9        | <i>SLC30A8</i>     | 0.01        | 0.4            |
| 8     | 144.284    | 144.328  | 12       | <i>BOP1</i>        | 0.009       | 0.5            |
| 9     | 22.003     | 22.136   | 14       | <i>CDKN2B</i>      | 0.005       | 0.7            |
| 9     | 81.68      | 81.697   | 5        | <i>TLE1</i>        | 0.007       | 0.6            |
| 9     | 123.351    | 123.361  | 6        | <i>CRB2</i>        | 0.001       | 1              |
| 10    | 12.26      | 12.272   | 2        | .                  | 0.003       | 0.8            |
| 10    | 79.181     | 79.205   | 16       | <i>ZMIZ1</i>       | 0.024       | 0.07           |
| 10    | 92.197     | 92.733   | 62       | <i>CPEB3</i>       | −0.005      | 0.7            |
| 10    | 112.97     | 113.095  | 18       | <i>TCF7L2</i>      | −0.011      | 0.4            |
| 10    | 122.356    | 123.034  | 10       | <i>ACADSB</i>      | 0.01        | 0.4            |
| 11    | 2.639      | 2.837    | 23       | <i>COX6CP18</i>    | 0.011       | 0.4            |
| 11    | 17.347     | 17.4     | 8        | <i>ABCC8</i>       | −0.005      | 0.7            |
| 11    | 43.731     | 43.857   | 7        | <i>HSD17B12</i>    | −0.015      | 0.3            |
| 11    | 65.589     | 65.896   | 7        | <i>AP5B1</i>       | −0.022      | 0.1            |
| 11    | 92.941     | 92.976   | 9        | <i>MTNR1B</i>      | −0.002      | 0.9            |
| 12    | 4.182      | 4.267    | 2        | <i>CCND2-AS1</i>   | 0.017       | 0.2            |
| 12    | 27.766     | 27.812   | 9        | <i>KLHL42</i>      | 0.048       | 3e−04          |
| 12    | 33.228     | 33.23    | 1        | .                  | 0.013       | 0.3            |
| 12    | 65.792     | 65.827   | 4        | <i>HMGGA2</i>      | 0.015       | 0.3            |
| 12    | 120.614    | 121.034  | 35       | <i>ACADS</i>       | −0.003      | 0.8            |

**Table 6** Regressions of age at onset on regional genotypic scores for type 2 diabetes (*Continued*)

| Chrom | Start (Mb) | End (Mb) | Num SNPs | Nearest gene         | Coefficient | <i>p</i> value |
|-------|------------|----------|----------|----------------------|-------------|----------------|
| 13    | 80.131     | 80.187   | 5        | .                    | 0.003       | 0.8            |
| 15    | 61.826     | 62.123   | 22       | <i>C2CD4A</i>        | − 0.004     | 0.8            |
| 15    | 77.092     | 77.615   | 22       | <i>HMG20A</i>        | − 0.022     | 0.1            |
| 15    | 90.961     | 91.024   | 11       | <i>PRC1</i>          | 0.029       | 0.03           |
| 16    | 53.764     | 53.811   | 14       | <i>FTO</i>           | 0.005       | 0.7            |
| 16    | 75.201     | 75.269   | 16       | <i>BCAR1</i>         | 0.033       | 0.01           |
| 16    | 81.491     | 81.501   | 2        | <i>CMIP</i>          | 0.008       | 0.5            |
| 17    | 3.981      | 4.37     | 15       | <i>ANKFY1</i>        | 0.01        | 0.5            |
| 17    | 9.862      | 9.903    | 13       | <i>GLP2R</i>         | 0.009       | 0.5            |
| 17    | 48.88      | 49.018   | 16       | <i>ATP5G1</i>        | − 0.009     | 0.5            |
| 18    | 7.062      | 7.077    | 5        | <i>LAMA1</i>         | − 0.002     | 0.9            |
| 18    | 60.064     | 60.246   | 15       | <i>RNU4-17P</i>      | 0.015       | 0.3            |
| 19    | 44.889     | 45.811   | 12       | <i>APOC1</i>         | 0.022       | 0.09           |
| 22    | 29.74      | 30.214   | 16       | <i>ASCC2</i>         | 0.01        | 0.4            |
| 22    | 49.963     | 50.015   | 11       | <i>IL17REL</i>       | 0.002       | 0.9            |
| .     | .          | .        | 52       | Residual genome-wide | 0.022       | 0.1            |

**Table 7** Regressions of log C-peptide on regional genotypic scores for type 1 diabetes

| Chrom | Start (Mb) | End (Mb) | Num SNPs | Nearest gene         | Coefficient | <i>p</i> value |
|-------|------------|----------|----------|----------------------|-------------|----------------|
| 1     | 39.526     | 39.585   | 2        | <i>BMP8A</i>         | 0.018       | 0.1            |
| 1     | 63.643     | 63.66    | 3        | <i>PGM1</i>          | 0.01        | 0.3            |
| 1     | 113.286    | 113.994  | 28       | <i>PTPN22</i>        | −0.027      | 0.01           |
| 1     | 172.706    | 172.71   | 1        | .                    | 0.024       | 0.03           |
| 1     | 206.767    | 206.784  | 2        | <i>IL10</i>          | −0.003      | 0.8            |
| 2     | 19.704     | 19.704   | 1        | .                    | −0.007      | 0.5            |
| 2     | 100.13     | 100.254  | 10       | <i>AFF3</i>          | −0.029      | 0.009          |
| 2     | 162.254    | 162.404  | 4        | <i>IFIH1</i>         | −0.016      | 0.2            |
| 2     | 203.829    | 203.93   | 13       | <i>CTLA4</i>         | 0.003       | 0.8            |
| 4     | 122.078    | 122.64   | 9        | <i>IL21</i>          | 0.017       | 0.1            |
| 4     | 165.65     | 165.653  | 1        | .                    | −0.011      | 0.3            |
| 5     | 168.799    | 168.808  | 1        | <i>SLIT3</i>         | 0.013       | 0.3            |
| 6     | 25.082     | 33.885   | 941      | HLA residual         | −0.06       | 6e−08          |
| 6     | 25.082     | 33.885   | 941      | HLA serotype         | −0.071      | 4e−10          |
| 6     | 90.104     | 90.293   | 7        | <i>BACH2</i>         | −0.021      | 0.06           |
| 6     | 126.334    | 126.556  | 3        | <i>CENPW</i>         | 0.018       | 0.1            |
| 7     | 50.399     | 50.971   | 6        | <i>IKZF1</i>         | 0.015       | 0.2            |
| 9     | 4.283      | 4.296    | 8        | <i>GLIS3</i>         | −0.014      | 0.2            |
| 10    | 6.038      | 6.14     | 13       | <i>IL2RA</i>         | −0.026      | 0.02           |
| 10    | 33.13      | 33.137   | 1        | <i>NRP1</i>          | −0.02       | 0.07           |
| 11    | 2.08       | 2.291    | 13       | <i>INS</i>           | −0.052      | 3e−06          |
| 11    | 119.966    | 119.966  | 1        | .                    | −0.01       | 0.4            |
| 12    | 55.971     | 56.125   | 12       | <i>ERBB3</i>         | −0.002      | 0.9            |
| 12    | 110.922    | 112.755  | 38       | <i>SH2B3</i>         | −0.011      | 0.3            |
| 14    | 68.797     | 68.797   | 1        | .                    | −0.011      | 0.3            |
| 14    | 98.033     | 98.033   | 1        | .                    | 0.001       | 0.9            |
| 15    | 78.939     | 78.947   | 2        | <i>CTSH</i>          | 0.007       | 0.5            |
| 16    | 10.946     | 11.342   | 36       | <i>CLEC16A</i>       | −0.014      | 0.2            |
| 16    | 28.29      | 28.62    | 8        | <i>IL27</i>          | −0.008      | 0.4            |
| 16    | 75.213     | 75.262   | 3        | <i>BCAR1</i>         | 0.007       | 0.5            |
| 17    | 39.82      | 40.668   | 13       | <i>ORMDL3</i>        | 0.008       | 0.5            |
| 17    | 45.997     | 45.997   | 1        | <i>MAPT</i>          | 0.005       | 0.6            |
| 18    | 12.747     | 12.877   | 8        | <i>PTPN2</i>         | 0.002       | 0.9            |
| 18    | 69.863     | 69.872   | 2        | <i>CD226</i>         | 0.012       | 0.3            |
| 19    | 46.716     | 46.716   | 1        | <i>PRKD2</i>         | −0.009      | 0.4            |
| 19    | 48.704     | 48.704   | 1        | <i>FUT2</i>          | −0.003      | 0.8            |
| 20    | 1.63       | 1.695    | 4        | <i>RN7SL561P</i>     | 0.005       | 0.7            |
| 20    | 9.424      | 9.424    | 1        | <i>PLCB4</i>         | 0.025       | 0.02           |
| 21    | 42.416     | 42.428   | 5        | <i>UBASH3A</i>       | 0.006       | 0.6            |
| 22    | 29.715     | 30.765   | 17       | <i>ASCC2</i>         | 0.007       | 0.5            |
| 22    | 37.148     | 37.195   | 3        | <i>RAC2</i>          | 0.004       | 0.7            |
| .     | .          | .        | 29       | Residual genome-wide | −0.008      | 0.4            |

**Table 8** Regressions of log C-peptide on regional genotypic scores for type 2 diabetes

| Chrom | Start (Mb) | End (Mb) | Num SNPs | Nearest gene       | Coefficient | <i>p</i> value |
|-------|------------|----------|----------|--------------------|-------------|----------------|
| 1     | 39.147     | 39.57    | 6        | <i>BMP8A</i>       | 0.013       | 0.2            |
| 1     | 213.972    | 213.99   | 15       | <i>PROX1</i>       | 0.011       | 0.3            |
| 1     | 219.479    | 219.615  | 14       | <i>ZC3H11B</i>     | 0.007       | 0.5            |
| 2     | 43.222     | 43.623   | 67       | <i>LINC01126</i>   | 0           | 1              |
| 2     | 60.307     | 60.372   | 17       | <i>MIR4432HG</i>   | 0.007       | 0.5            |
| 2     | 65.415     | 65.457   | 3        | <i>SPRED2</i>      | 0.013       | 0.3            |
| 2     | 160.234    | 160.4    | 18       | <i>ITGB6</i>       | −0.014      | 0.2            |
| 2     | 226.133    | 226.317  | 17       | .                  | 0.004       | 0.7            |
| 3     | 11.986     | 12.372   | 14       | <i>ACTG1P12</i>    | 0.017       | 0.1            |
| 3     | 22.936     | 23.441   | 4        | <i>RPL24P7</i>     | 0.011       | 0.3            |
| 3     | 64.714     | 64.744   | 7        | <i>ADAMTS9-AS2</i> | −0.013      | 0.2            |
| 3     | 123.217    | 123.391  | 7        | <i>ADCY5</i>       | 0.003       | 0.8            |
| 3     | 185.556    | 185.83   | 20       | <i>IGF2BP2</i>     | 0.023       | 0.04           |
| 4     | 6.263      | 6.323    | 31       | <i>PPP2R2C</i>     | 0.016       | 0.2            |
| 4     | 94.08      | 94.215   | 9        | <i>HMGB3P15</i>    | 0.003       | 0.8            |
| 4     | 184.774    | 184.81   | 12       | <i>ACSL1</i>       | 0.006       | 0.6            |
| 5     | 56.558     | 56.566   | 6        | <i>C5orf67</i>     | −0.001      | 0.9            |
| 5     | 102.257    | 102.287  | 3        | <i>SLCO4C1</i>     | −0.012      | 0.3            |
| 6     | 20.529     | 20.989   | 42       | <i>CDKAL1</i>      | 0.024       | 0.03           |
| 6     | 31.139     | 32.629   | 32       | <i>HLA region</i>  | −0.073      | 5e−11          |
| 6     | 126.336    | 126.76   | 14       | <i>CENPW</i>       | 0.026       | 0.02           |
| 7     | 13.846     | 15.026   | 33       | <i>DGKB</i>        | −0.004      | 0.7            |
| 7     | 28.102     | 28.217   | 21       | <i>JAZF1</i>       | 0.03        | 0.007          |
| 7     | 157.184    | 157.239  | 2        | <i>UBE3C</i>       | 0.009       | 0.4            |
| 8     | 41.662     | 41.677   | 3        | <i>ANK1</i>        | 0.008       | 0.5            |
| 8     | 117.171    | 117.225  | 9        | <i>SLC30A8</i>     | 0.007       | 0.5            |
| 8     | 144.284    | 144.328  | 12       | <i>BOP1</i>        | 0           | 1              |
| 9     | 22.003     | 22.136   | 14       | <i>CDKN2B</i>      | 0.028       | 0.01           |
| 9     | 81.68      | 81.697   | 5        | <i>TLE1</i>        | 0.002       | 0.9            |
| 9     | 123.351    | 123.361  | 6        | <i>CRB2</i>        | 0.025       | 0.02           |
| 10    | 12.26      | 12.272   | 2        | .                  | 0.016       | 0.1            |
| 10    | 79.181     | 79.205   | 16       | <i>ZMIZ1</i>       | 0.011       | 0.3            |
| 10    | 92.197     | 92.733   | 62       | <i>CPEB3</i>       | 0.016       | 0.1            |
| 10    | 112.97     | 113.095  | 18       | <i>TCF7L2</i>      | 0.03        | 0.008          |
| 10    | 122.356    | 123.034  | 10       | <i>ACADSB</i>      | −0.004      | 0.7            |
| 11    | 2.639      | 2.837    | 23       | <i>COX6CP18</i>    | 0.023       | 0.04           |
| 11    | 17.347     | 17.4     | 8        | <i>ABCC8</i>       | −0.004      | 0.7            |
| 11    | 43.731     | 43.857   | 7        | <i>HSD17B12</i>    | 0.022       | 0.04           |
| 11    | 65.589     | 65.896   | 7        | <i>AP5B1</i>       | 0.006       | 0.6            |
| 11    | 92.941     | 92.976   | 9        | <i>MTNR1B</i>      | −0.011      | 0.3            |
| 12    | 4.182      | 4.267    | 2        | <i>CCND2-AS1</i>   | −0.013      | 0.2            |
| 12    | 27.766     | 27.812   | 9        | <i>KLHL42</i>      | −0.016      | 0.2            |
| 12    | 33.228     | 33.23    | 1        | .                  | −0.001      | 0.9            |
| 12    | 65.792     | 65.827   | 4        | <i>HMGA2</i>       | 0.016       | 0.1            |
| 12    | 120.614    | 121.034  | 35       | <i>ACADS</i>       | 0.005       | 0.6            |

**Table 8** Regressions of log C-peptide on regional genotypic scores for Type 2 diabetes (*Continued*)

| Chrom | Start (Mb) | End (Mb) | Num SNPs | Nearest gene         | Coefficient | <i>p</i> value |
|-------|------------|----------|----------|----------------------|-------------|----------------|
| 13    | 80.131     | 80.187   | 5        | .                    | 0.011       | 0.3            |
| 15    | 61.826     | 62.123   | 22       | <i>C2CD4A</i>        | −0.001      | 0.9            |
| 15    | 77.092     | 77.615   | 22       | <i>HMG20A</i>        | 0.022       | 0.04           |
| 15    | 90.961     | 91.024   | 11       | <i>PRC1</i>          | −0.006      | 0.6            |
| 16    | 53.764     | 53.811   | 14       | <i>FTO</i>           | −0.006      | 0.6            |
| 16    | 75.201     | 75.269   | 16       | <i>BCAR1</i>         | −0.006      | 0.6            |
| 16    | 81.491     | 81.501   | 2        | <i>CMIP</i>          | −0.001      | 0.9            |
| 17    | 3.981      | 4.37     | 15       | <i>ANKFY1</i>        | −0.002      | 0.9            |
| 17    | 9.862      | 9.903    | 13       | <i>GLP2R</i>         | −0.017      | 0.1            |
| 17    | 48.88      | 49.018   | 16       | <i>ATP5G1</i>        | 0.016       | 0.2            |
| 18    | 7.062      | 7.077    | 5        | <i>LAMA1</i>         | −0.005      | 0.7            |
| 18    | 60.064     | 60.246   | 15       | <i>RNU4-17P</i>      | 0.027       | 0.02           |
| 19    | 44.889     | 45.811   | 12       | <i>APOC1</i>         | 0.002       | 0.8            |
| 22    | 29.74      | 30.214   | 16       | <i>ASCC2</i>         | 0.003       | 0.8            |
| 22    | 49.963     | 50.015   | 11       | <i>IL17REL</i>       | −0.012      | 0.3            |
| .     | .          | .        | 52       | Residual genome-wide | 0           | 1              |
